# Supplementary material
Source: PubMed Central journal article supplement (PMC4747810)
Supplement: NIHMS718104-supplement-01.pdf [file NIHMS718104-supplement-01.pdf]

Supplementary Table I.

| A. P5 isotype targeting primers (forward read) |                                                                    |
|------------------------------------------------|--------------------------------------------------------------------|
| Primer name                                    | Primer sequence                                                    |
| IgM                                            | ACACTCTTTCCCTACACGACGCTCTTCCGATCTNNNN+barcode+GGGAATTCTCACAGGAGACG |
| IgD                                            | ACACTCTTTCCCTACACGACGCTCTTCCGATCTNNNN+barcode+CCCTGATATGATGGGGAACA |
| IgG                                            | ACACTCTTTCCCTACACGACGCTCTTCCGATCTNNNN+barcode+CAGGCAGCCCAGGGC      |
| IgA                                            | ACACTCTTTCCCTACACGACGCTCTTCCGATCTNNNN+barcode+AGCCCTGGACCAGGCA     |
| IgE                                            | ACACTCTTTCCCTACACGACGCTCTTCCGATCTNNNN+barcode+GAAGACGGATGGGCTCTGT  |

B. P7 variable gene targeting primers (reverse read)

| Primer name | Primer sequence                                                |
|-------------|----------------------------------------------------------------|
| VH1         | GGCATTCTGCTGAACCGCTCTCCGATCT+barcode+GGCCTCAGTGAAGGTCTCCTGCAAG |
| VH2         | GGCATTCTGCTGAACCGCTCTCCGATCT+barcode+GTCTGGTCTACGCTGGTCAAACCC  |
| VH3         | GGCATTCTGCTGAACCGCTCTCCGATCT+barcode+CTGGGGGTCCCTGAGACTCTCCTG  |
| VH4         | GGCATTCTGCTGAACCGCTCTCCGATCT+barcode+CTTCGGAGACCCTGTCCCTCACCTG |
| VH5         | GGCATTCTGCTGAACCGCTCTCCGATCT+barcode+CGGGGAGTCTCTGAAGATCTCCTGT |
| VH6         | GGCATTCTGCTGAACCGCTCTCCGATCT+barcode+TCGCAGACCCTCTCACTCACCTGTG |

| C. Second stage PCR primers |                                                     |
|-----------------------------|-----------------------------------------------------|
| Primer name                 | Primer sequence                                     |
| P5_2nd_PCR                  | AATGATACGGCGACCACCGAGATCTACACTCTTTCCCTACACGA        |
| P7_2nd_PCR                  | CAAGCAGAAGACGGCATACGAGATCGGTCTCGGCATTCTGCTGAACCGCTC |

| D. Barcode designations for sample amplifications |                      |            |            |                    |
|---------------------------------------------------|----------------------|------------|------------|--------------------|
| Participant identifier                            | Amplification number | P5 barcode | P7 barcode | Sequencing library |
| BFI-0000372                                       | 1                    | TGTGAGCG   | GATCGAGC   | 1                  |
| BFI-0000372                                       | 2                    | CACGCACT   | CATGTCAT   | 1                  |
| BFI-0000372                                       | 3                    | GATCGAGC   | TGTGAGCG   | 1                  |
| BFI-0000372                                       | 4                    | TCGTCGTC   | TCGTCGTC   | 1                  |
| BFI-0000372                                       | 5                    | ACGTAACG   | ACGTAACG   | 1                  |
| BFI-0000372                                       | 6                    | ATGATACA   | CTATAGAG   | 1                  |
| BFI-0000373                                       | 7                    | GCGCATGC   | GATCGAGC   | 1                  |
| BFI-0000373                                       | 8                    | TGTGAGCG   | CATGTCAT   | 1                  |
| BFI-0000373                                       | 9                    | ATGATACA   | GCGCATGC   | 1                  |
| BFI-0000373                                       | 10                   | CGTATGCA   | TCGTCGTC   | 1                  |
| BFI-0000373                                       | 11                   | ACGTCGTA   | ACGTCGTA   | 1                  |
| BFI-0000373                                       | 12                   | CATGTCAT   | CTATAGAG   | 1                  |
| BFI-0000374                                       | 13                   | ACACGACG   | GATCGAGC   | 1                  |
| BFI-0000374                                       | 14                   | GCGCATGC   | CATGTCAT   | 1                  |
| BFI-0000374                                       | 15                   | CATGTCAT   | GCGCATGC   | 1                  |
| BFI-0000374                                       | 16                   | CGAGCAGA   | TCGTCGTC   | 1                  |
| BFI-0000374                                       | 17                   | ACGAGACG   | ACGAGACG   | 1                  |
| BFI-0000374                                       | 18                   | CACGCACT   | CTATAGAG   | 1                  |
| BFI-0000375                                       | 19                   | TCGTCGTC   | GATCGAGC   | 1                  |
| BFI-0000375                                       | 20                   | CACGCACT   | GCGCATGC   | 1                  |
| BFI-0000375                                       | 21                   | GATCGAGC   | TCGTCGTC   | 1                  |
| BFI-0000375                                       | 22                   | TGTGAGCG   | CTATAGAG   | 1                  |
| BFI-0000376                                       | 23                   | CGTATGCA   | GATCGAGC   | 1                  |
| BFI-0000376                                       | 24                   | TCGTCGTC   | CATGTCAT   | 1                  |
| BFI-0000376                                       | 25                   | TGTGAGCG   | GCGCATGC   | 1                  |
| BFI-0000376                                       | 26                   | ATGATACA   | CGTATGCA   | 1                  |
| BFI-0000376                                       | 27                   | GCGCATGC   | CTATAGAG   | 1                  |
| BFI-0000376                                       | 28                   | CGCATCGT   | CGCATCGT   | 1                  |
| BFI-0000377                                       | 29                   | CGAGCAGA   | GATCGAGC   | 1                  |
| BFI-0000377                                       | 30                   | GCGCATGC   | GCGCATGC   | 1                  |
| BFI-0000377                                       | 31                   | CATGTCAT   | CGTATGCA   | 1                  |
| BFI-0000377                                       | 32                   | ACACGACG   | CTATAGAG   | 1                  |
| BFI-0000377                                       | 33                   | CGAACTAC   | CGAACTAC   | 1                  |
| BFI-0000378                                       | 34                   | ATGATACA   | ATGATACA   | 1                  |
| BFI-0000378                                       | 35                   | GATCGAGC   | GATCGAGC   | 1                  |
| BFI-0000378                                       | 36                   | CGAGCAGA   | CATGTCAT   | 1                  |
| BFI-0000378                                       | 37                   | ACACGACG   | GCGCATGC   | 1                  |
| BFI-0000378                                       | 38                   | CACGCACT   | CGTATGCA   | 1                  |
| BFI-0000379                                       | 39                   | ATGATACA   | GCATGCAC   | 1                  |
| BFI-0000379                                       | 40                   | GATCGAGC   | CATGTCAT   | 1                  |

|             |    |          |          |   |
|-------------|----|----------|----------|---|
| BFI-0000379 | 41 | TCGTCGTC | GCGCATGC | 1 |
| BFI-0000379 | 42 | TGTGAGCG | CGTATGCA | 1 |
| BFI-0000379 | 43 | CGTATGCA | CTATAGAG | 1 |
| BFI-0000380 | 44 | CACGCACT | ATGATACA | 1 |
| BFI-0000380 | 45 | CATGTCAT | GCATGCAC | 1 |
| BFI-0000380 | 46 | ATGATACA | CACGCACT | 1 |
| BFI-0000380 | 47 | CGAGCAGA | CTATAGAG | 1 |
| BFI-0000381 | 48 | CACGCACT | GCATGCAC | 1 |
| BFI-0000381 | 49 | CATGTCAT | CACGCACT | 1 |
| BFI-0000381 | 50 | CGAGCAGA | GCGCATGC | 1 |
| BFI-0000381 | 51 | ACACGACG | CGTATGCA | 1 |
| BFI-0000381 | 52 | GATCGAGC | CTATAGAG | 1 |
| BFI-0000381 | 53 | CGAAGCGT | CGAAGCGT | 1 |
| BFI-0000382 | 54 | TGTGAGCG | GCATGCAC | 1 |
| BFI-0000382 | 55 | TCGTCGTC | CGTATGCA | 1 |
| BFI-0000382 | 56 | ATGATACA | AGTATCTG | 1 |
| BFI-0000382 | 57 | CTCCACGT | CTCCACGT | 1 |
| BFI-0000383 | 58 | GCGCATGC | GCATGCAC | 1 |
| BFI-0000383 | 59 | TGTGAGCG | CACGCACT | 1 |
| BFI-0000383 | 60 | ATGATACA | ACACGACG | 1 |
| BFI-0000383 | 61 | CGTATGCA | CGTATGCA | 1 |
| BFI-0000383 | 62 | CATGTCAT | AGTATCTG | 1 |
| BFI-0000384 | 63 | GCGCATGC | CACGCACT | 1 |
| BFI-0000384 | 64 | CATGTCAT | ACACGACG | 1 |
| BFI-0000384 | 65 | CGAGCAGA | CGTATGCA | 1 |
| BFI-0000384 | 66 | CACGCACT | AGTATCTG | 1 |
| BFI-0000384 | 67 | GTGTAACG | GTGTAACG | 1 |
| BFI-0000385 | 68 | TGTGAGCG | ATGATACA | 1 |
| BFI-0000385 | 69 | TCGTCGTC | GCATGCAC | 1 |
| BFI-0000385 | 70 | ACACGACG | CACGCACT | 1 |
| BFI-0000385 | 71 | TGTGAGCG | AGTATCTG | 1 |
| BFI-0000386 | 72 | CGTATGCA | GCATGCAC | 1 |
| BFI-0000386 | 73 | TCGTCGTC | CACGCACT | 1 |
| BFI-0000386 | 74 | TGTGAGCG | ACACGACG | 1 |
| BFI-0000386 | 75 | ATGATACA | CGAGCAGA | 1 |
| BFI-0000386 | 76 | GCGCATGC | AGTATCTG | 1 |
| BFI-0000386 | 77 | GTTTCGTA | GTTTCGTA | 1 |
| BFI-0000387 | 78 | CGAGCAGA | GCATGCAC | 1 |
| BFI-0000387 | 79 | CATGTCAT | CGAGCAGA | 1 |
| BFI-0000387 | 80 | ACACGACG | AGTATCTG | 1 |
| BFI-0000387 | 81 | GATGTGTA | GATGTGTA | 1 |
| BFI-0000388 | 82 | GATCGAGC | GCATGCAC | 1 |
| BFI-0000388 | 83 | CGAGCAGA | CACGCACT | 1 |

|              |     |          |          |   |
|--------------|-----|----------|----------|---|
| BFI-0000388  | 84  | ACACGACG | ACACGACG | 1 |
| BFI-0000388  | 85  | CACGCACT | CGAGCAGA | 1 |
| BFI-0000388  | 86  | TCGTCGTC | AGTATCTG | 1 |
| BFI-0000389  | 87  | ATGATACA | TACGATGC | 1 |
| BFI-0000389  | 88  | GATCGAGC | CACGCACT | 1 |
| BFI-0000389  | 89  | TCGTCGTC | ACACGACG | 1 |
| BFI-0000389  | 90  | TGTGAGCG | CGAGCAGA | 1 |
| BFI-0000389  | 91  | CGTATGCA | AGTATCTG | 1 |
| BFI-0000390  | 92  | ACACGACG | ATGATACA | 1 |
| BFI-0000390  | 93  | CATGTCAT | TACGATGC | 1 |
| BFI-0000390  | 94  | ATGATACA | TGTGAGCG | 1 |
| BFI-0000390  | 95  | CGAGCAGA | AGTATCTG | 1 |
| BFI-0000391  | 96  | TCGTCGTC | ATGATACA | 1 |
| BFI-0000391  | 97  | CACGCACT | TACGATGC | 1 |
| BFI-0000391  | 98  | CATGTCAT | TGTGAGCG | 1 |
| BFI-0000391  | 99  | CGAGCAGA | ACACGACG | 1 |
| BFI-0000391  | 100 | ACACGACG | CGAGCAGA | 1 |
| BFI-0000391  | 101 | GATCGAGC | AGTATCTG | 1 |
| BFI-0000392  | 102 | TGTGAGCG | TACGATGC | 1 |
| BFI-0000392  | 103 | CACGCACT | TGTGAGCG | 1 |
| BFI-0000392  | 104 | GATCGAGC | ACACGACG | 1 |
| BFI-0000392  | 105 | TCGTCGTC | CGAGCAGA | 1 |
| BFI-0000392  | 106 | ATGATACA | GAGTCATA | 1 |
| BFI-0000392  | 107 | TAATGCGT | TAATGCGT | 1 |
| BFI-0000393  | 108 | GCGCATGC | TACGATGC | 1 |
| BFI-0000393  | 109 | TGTGAGCG | TGTGAGCG | 1 |
| BFI-0000393  | 110 | ATGATACA | TCGTCGTC | 1 |
| BFI-0000393  | 111 | CGTATGCA | CGAGCAGA | 1 |
| BFI-0000393  | 112 | CATGTCAT | GAGTCATA | 1 |
| BFI-0000394  | 113 | CATGTCAT | TCGTCGTC | 1 |
| BFI-0000394  | 114 | CGAGCAGA | CGAGCAGA | 1 |
| BFI-0000394  | 115 | CACGCACT | GAGTCATA | 1 |
| BFI-0000394  | 116 | CGTATGCA | GAGTCATA | 1 |
| BFI-0000394* | 117 | CGTATGCA | ATGATACA | 1 |
| BFI-0000394* | 118 | GCGCATGC | TGTGAGCG | 1 |
| BFI-0000395  | 119 | CGAGCAGA | ATGATACA | 1 |
| BFI-0000395  | 120 | TCGTCGTC | TACGATGC | 1 |
| BFI-0000395  | 121 | GATCGAGC | CGAGCAGA | 1 |
| BFI-0000395  | 122 | TGTGAGCG | GAGTCATA | 1 |
| BFI-0000396  | 123 | GATCGAGC | ATGATACA | 1 |
| BFI-0000396  | 124 | ATGATACA | GATCGAGC | 1 |
| BFI-0000396  | 125 | CGTATGCA | TACGATGC | 1 |
| BFI-0000396  | 126 | TCGTCGTC | TGTGAGCG | 1 |

|             |     |          |          |   |
|-------------|-----|----------|----------|---|
| BFI-0000396 | 127 | TGTGAGCG | TCGTCGTC | 1 |
| BFI-0000396 | 128 | GCGCATGC | GAGTCATA | 1 |
| BFI-0000397 | 129 | ATGATACA | CATGTCAT | 1 |
| BFI-0000397 | 130 | CGTATGCA | TGTGAGCG | 1 |
| BFI-0000397 | 131 | GCGCATGC | TCGTCGTC | 1 |
| BFI-0000397 | 132 | ACACGACG | GAGTCATA | 1 |
| BFI-0000398 | 133 | CACGCACT | GATCGAGC | 1 |
| BFI-0000398 | 134 | GATCGAGC | TACGATGC | 1 |
| BFI-0000398 | 135 | CATGTCAT | CATGTCAT | 1 |
| BFI-0000398 | 136 | CGAGCAGA | TGTGAGCG | 1 |
| BFI-0000398 | 137 | ACACGACG | TCGTCGTC | 1 |
| BFI-0000398 | 138 | TCGTCGTC | GAGTCATA | 1 |
| BFI-0000821 | 139 | CGAGCAGA | ACACGACG | 2 |
| BFI-0001755 | 140 | CGTATGCA | ACACGACG | 2 |
| BFI-0002450 | 141 | CGAGCAGA | CATGTCAT | 2 |
| BFI-0002451 | 142 | ATGATACA | CACGCACT | 2 |
| BFI-0002452 | 143 | GCATGCAC | CATGTCAT | 2 |
| BFI-0002453 | 144 | TACGATGC | CATGTCAT | 2 |

\*Note: A poor sample amplification for BFI-0000394 was repeated using a different barcode pair.

### S1A

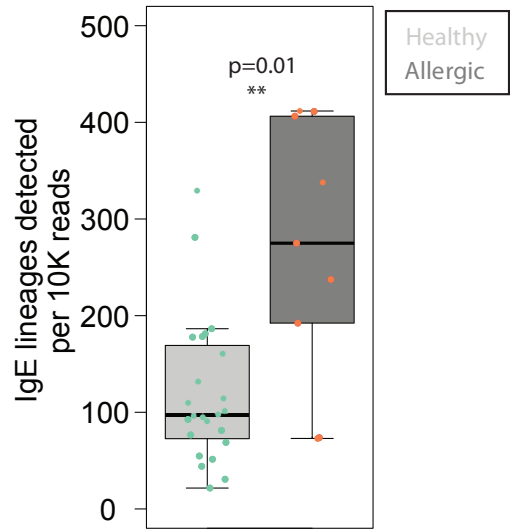

### S1B

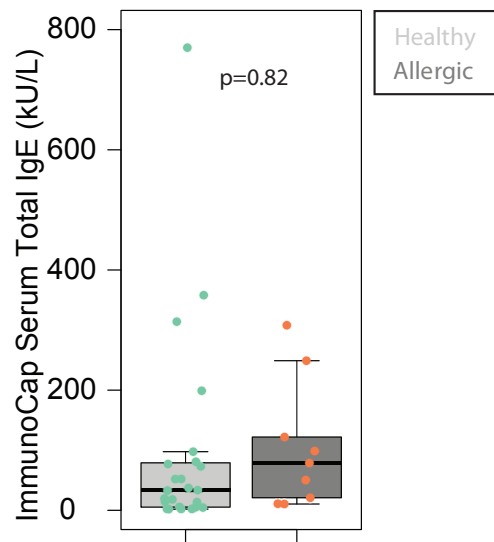

### S1C

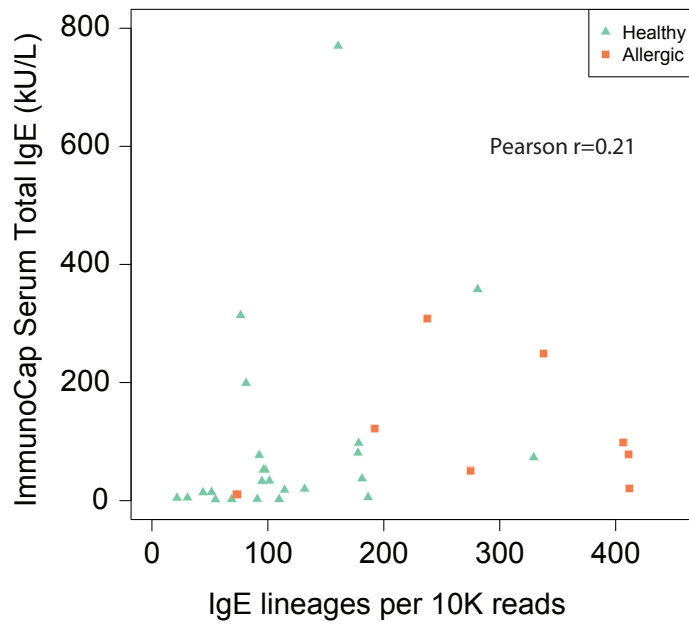



# S2

|    |   |   |    |    |    |   |    |             |
|----|---|---|----|----|----|---|----|-------------|
| 1  | 1 | 4 | 10 | 5  | 6  | 0 | 1  | BFI-0000372 |
| 0  | 1 | 3 | 7  | 3  | 3  | 3 | 1  | BFI-0000374 |
| 1  | 0 | 0 | 4  | 1  | 1  | 1 | 0  | BFI-0000376 |
| 6  | 3 | 8 | 14 | 17 | 8  | 2 | 0  | BFI-0000377 |
| 1  | 3 | 0 | 5  | 4  | 2  | 0 | 1  | BFI-0000378 |
| 1  | 1 | 0 | 1  | 1  | 1  | 0 | 0  | BFI-0000379 |
| 0  | 1 | 3 | 10 | 4  | 1  | 2 | 1  | BFI-0000380 |
| 0  | 0 | 0 | 0  | 0  | 1  | 0 | 0  | BFI-0000381 |
| 1  | 0 | 0 | 2  | 2  | 2  | 0 | 0  | BFI-0000382 |
| 1  | 2 | 1 | 6  | 1  | 4  | 0 | 1  | BFI-0000383 |
| 1  | 0 | 1 | 2  | 3  | 2  | 2 | 0  | BFI-0000384 |
| 1  | 0 | 1 | 8  | 5  | 1  | 3 | 1  | BFI-0000385 |
| 0  | 0 | 1 | 3  | 1  | 1  | 0 | 1  | BFI-0000387 |
| 3  | 0 | 0 | 8  | 1  | 3  | 1 | 0  | BFI-0000388 |
| 0  | 0 | 0 | 3  | 0  | 0  | 0 | 0  | BFI-0000393 |
| 3  | 5 | 2 | 6  | 3  | 2  | 0 | 1  | BFI-0000394 |
| 0  | 0 | 0 | 2  | 0  | 2  | 0 | 2  | BFI-0000396 |
| 0  | 1 | 0 | 27 | 4  | 2  | 0 | 1  | BFI-0000397 |
| 11 | 5 | 1 | 13 | 4  | 10 | 2 | 5  | BFI-0000398 |
| 1  | 0 | 2 | 10 | 8  | 1  | 2 | 0  | BFI-0000821 |
| 0  | 0 | 3 | 3  | 3  | 1  | 1 | 1  | BFI-0002450 |
| 0  | 0 | 0 | 1  | 0  | 0  | 1 | 0  | BFI-0002451 |
| 1  | 0 | 0 | 3  | 0  | 1  | 1 | 2  | BFI-0002452 |
| 1  | 0 | 4 | 9  | 17 | 3  | 0 | 2  | BFI-0002453 |
| 0  | 0 | 1 | 3  | 1  | 0  | 3 | 0  | BFI-0000373 |
| 1  | 0 | 1 | 9  | 6  | 2  | 4 | 1  | BFI-0000375 |
| 0  | 0 | 3 | 7  | 4  | 0  | 5 | 0  | BFI-0000386 |
| 0  | 1 | 2 | 8  | 6  | 3  | 2 | 5  | BFI-0000389 |
| 3  | 1 | 2 | 9  | 4  | 1  | 0 | 0  | BFI-0000390 |
| 5  | 7 | 2 | 7  | 5  | 5  | 1 | 2  | BFI-0000391 |
| 9  | 5 | 9 | 66 | 16 | 16 | 3 | 15 | BFI-0000392 |
| 5  | 3 | 1 | 7  | 3  | 2  | 2 | 1  | BFI-0000395 |
| 5  | 2 | 3 | 13 | 9  | 2  | 2 | 1  | BFI-0001755 |

Participant identifier

IgE-IgA2  
IgE-IgG4  
IgE-IgD  
IgE-IgG3  
IgE-IgG1  
IgE-IgG2  
IgE-IgA1

Nearest isotype neighbor  
by Hamming distance
